# Supplementary material for: Concentration distributions of dissolved Sb(III) and Sb(V) species in size-classified inhalable airborne particulate matter
Source: Royal Society of Chemistry journal article supplement (doi:10.1039/b920597g), 2009-12-23
Supplement: b920597g.pdf [file b920597g.pdf]

**Supplementary Table S1** Analytical results of National Institute of Standard and Technology  
 (NIST) SRM 1648

| Element | Analytical mode <sup>a</sup> | Mass / Charge | Detection limit <sup>b</sup> | Found <sup>c</sup> (mean ± sd) |      | Certified / Reference <sup>d</sup> | Recovery |
|---------|------------------------------|---------------|------------------------------|--------------------------------|------|------------------------------------|----------|
|         |                              | <i>m/z</i>    | pg ml <sup>-1</sup>          | µg g <sup>-1</sup>             |      | µg g <sup>-1</sup>                 | %        |
| Be      | NG                           | 9             | 0.228                        | 1.27 ±                         | 0.11 | –                                  | –        |
| Al      | He                           | 27            | 185                          | 32500 ±                        | 1100 | 34200                              | 95.1     |
| V       | He                           | 51            | 2.06                         | 130 ±                          | 4    | 127                                | 102.4    |
| Cr      | He                           | 53            | 2.65                         | 400 ±                          | 24   | 403                                | 99.4     |
| Mn      | H <sub>2</sub>               | 55            | 1.71                         | 778 ±                          | 34   | 786                                | 99.0     |
| Fe      | H <sub>2</sub>               | 57            | 119                          | 38100 ±                        | 1600 | 39100                              | 97.5     |
| Co      | He                           | 59            | 0.734                        | 17.0 ±                         | 0.8  | 18 <sup>d</sup>                    | 94.2     |
| Ni      | He                           | 60            | 2.89                         | 66.0 ±                         | 1.2  | 82                                 | 80.4     |
| Cu      | He                           | 63            | 16.7                         | 563 ±                          | 45   | 609                                | 92.5     |
| Zn      | He                           | 66            | 88.4                         | 4780 ±                         | 148  | 4760                               | 100.4    |
| As      | He                           | 75            | 0.819                        | 114 ±                          | 3    | 115                                | 99.0     |
| Se      | H <sub>2</sub>               | 78            | 2.17                         | 24.7 ±                         | 1.1  | 27                                 | 91.5     |
| Mo      | He                           | 95            | 2.29                         | 14.6 ±                         | 0.6  | –                                  | –        |
| Ag      | He                           | 107           | 0.331                        | 6.05 ±                         | 0.16 | 6 <sup>d</sup>                     | 100.9    |
| Cd      | He                           | 111           | 0.461                        | 71.8 ±                         | 4.4  | 75                                 | 95.7     |
| Sb      | He                           | 121           | 1.27                         | 42.7 ±                         | 1.5  | 45 <sup>d</sup>                    | 95.0     |
| Ba      | He                           | 137           | 29.3                         | 702 ±                          | 20   | 737 <sup>d</sup>                   | 95.3     |
| Tl      | He                           | 205           | 0.0632                       | 2.34 ±                         | 0.09 | –                                  | –        |
| Pb      | He                           | 208           | 17.1                         | 6650 ±                         | 156  | 6550                               | 101.6    |
| Th      | He                           | 232           | 0.120                        | 7.01 ±                         | 0.05 | 7.4 <sup>d</sup>                   | 94.7     |
| U       | He                           | 238           | 0.0367                       | 5.30 ±                         | 0.14 | 5.5                                | 96.4     |

<sup>a</sup> Determination was performed under three different analytical modes. NG means non-gas mode which was performed without octopole reaction cell system. He means collision mode by using helium gas. H<sub>2</sub> means reaction mode by using hydrogen gas. <sup>b</sup> Values were defined as three times the standard deviation of 10 calibration blank analyses. <sup>c</sup> Values were derived from the analyses of three samples. <sup>d</sup> Reference value.

**Supplementary Table S2** Elemental concentrations<sup>a</sup> in size-classified airborne particulate matter (APM)

| Element | Concentration / ng m <sup>-3</sup> |           |         |                             |           |         |
|---------|------------------------------------|-----------|---------|-----------------------------|-----------|---------|
|         | Roadside site (Tatebayashi)        |           |         | Residential site (Maebashi) |           |         |
|         | < 2.1 μm                           | 2.1–11 μm | > 11 μm | < 2.1 μm                    | 2.1–11 μm | > 11 μm |
| Be      | 0.0023                             | 0.018     | 0.011   | 0.0045                      | 0.011     | 0.0036  |
| Al      | 91                                 | 830       | 620     | 93                          | 620       | 250     |
| V       | 1.6                                | 1.5       | 1.0     | 1.2                         | 1.1       | 0.43    |
| Cr      | 13                                 | 4.2       | 1.5     | 3.0                         | 3.5       | 0.78    |
| Mn      | 18                                 | 17        | 10      | 6.9                         | 9.5       | 3.0     |
| Fe      | 250                                | 720       | 410     | 87                          | 370       | 130     |
| Co      | 0.17                               | 0.30      | 0.18    | 0.13                        | 0.29      | 0.087   |
| Ni      | 4.0                                | 2.0       | 0.80    | 2.0                         | 4.5       | 0.35    |
| Cu      | 10                                 | 23        | 4.9     | 5.0                         | 11        | 3.5     |
| Zn      | 79                                 | 48        | 41      | 32                          | 20        | 5.7     |
| As      | 0.93                               | 0.35      | 0.12    | 0.74                        | 0.25      | 0.045   |
| Se      | 0.69                               | 0.070     | 0.0092  | 0.37                        | 0.050     | 0.0039  |
| Mo      | 2.8                                | 1.5       | 0.32    | 2.4                         | 1.1       | 0.12    |
| Ag      | 0.23                               | 0.052     | 0.015   | 0.086                       | 0.031     | 0.0039  |
| Cd      | 0.40                               | 0.063     | 0.015   | 0.48                        | 0.041     | 0.0090  |
| Sb      | 3.4                                | 3.9       | 0.75    | 2.2                         | 0.99      | 0.13    |
| Ba      | 9.8                                | 33        | 8.7     | 5.4                         | 11        | 2.1     |
| Tl      | 0.058                              | 0.016     | 0.0057  | 0.037                       | 0.012     | 0.0015  |
| Pb      | 13                                 | 3.9       | 1.4     | 11                          | 2.7       | 0.52    |
| Th      | 0.0093                             | 0.090     | 0.063   | 0.0062                      | 0.048     | 0.015   |
| U       | 0.0056                             | 0.033     | 0.021   | 0.018                       | 0.029     | 0.0086  |

<sup>a</sup> Elemental concentrations in 13 size fractions were merged into 3 size ranges of  $D_p < 2.1$ ,  $2.1-11$ , and  $> 11$  μm.
